# Supplementary material
Source: Springer Nature journal article supplement (https://www.springermedizin.de/resource/supplementary/12865_2012_523_MOESM10_ESM.pdf/9428128)

A

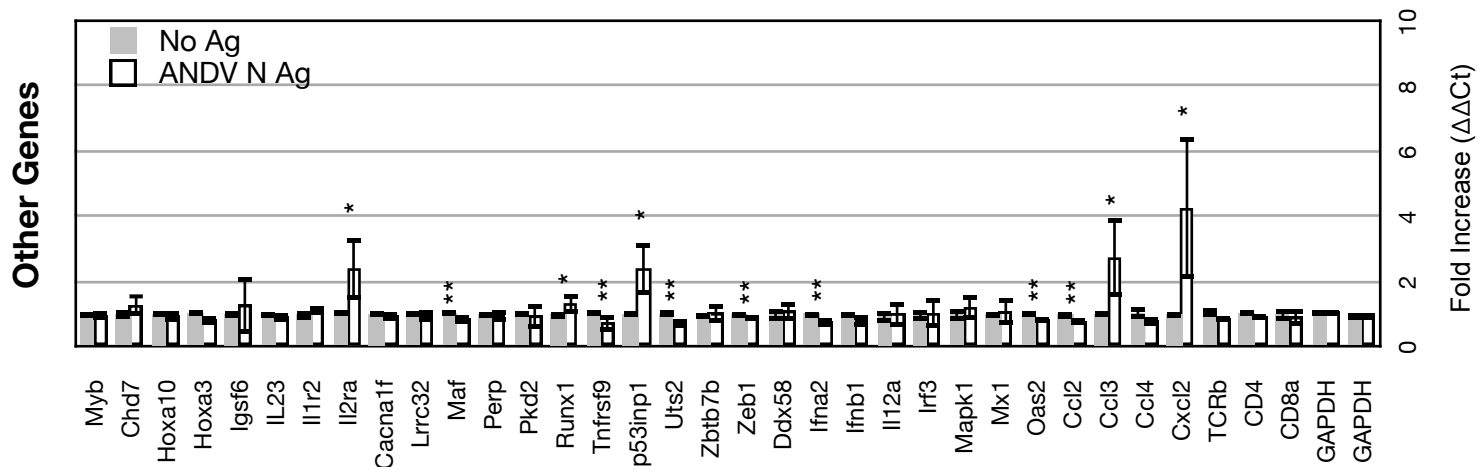

B

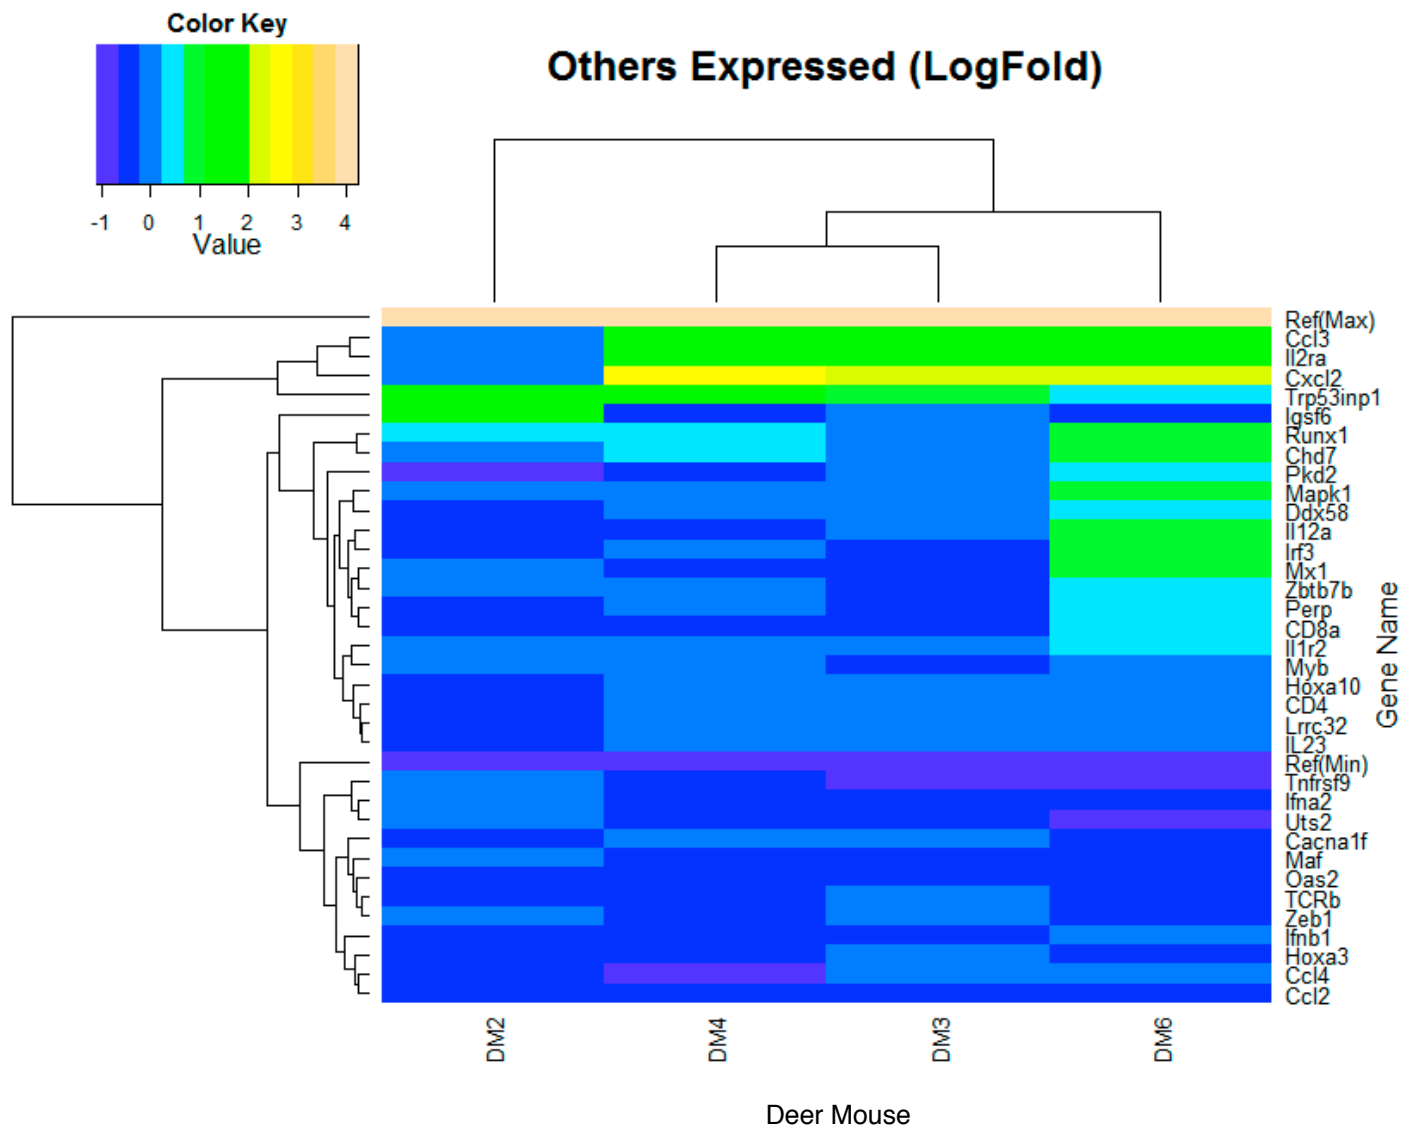

Supplement: MOESM10 [file 9428128]
